# Supplementary material for: Hierarchically heterostructured metal hydr(oxy)oxides for efficient overall water splitting
Source: Royal Society of Chemistry journal article supplement (doi:10.1039/c9nr02988e), 2019-01-01
Supplement: c9nr02988e1.pdf [file c9nr02988e1.pdf]

## Supporting Information

### **Hierarchically Heterostructured Metal Hydr(oxy)oxides for Efficient Overall Water Splitting**

Yang Liu,<sup>a, b, †</sup> Fengmei Wang,<sup>a, †</sup> Tofik Ahmed Shifa,<sup>a</sup> Jie Li,<sup>a, b</sup> Jing Tai,<sup>c</sup> Yu Zhang,<sup>a</sup> Junwei Chu,<sup>a</sup> Xueying Zhan,<sup>a</sup> Chongxin Shan<sup>\*d</sup> and Jun He<sup>\*a, b</sup>

---

*a. CAS Center for Excellence in Nanoscience, CAS Key Laboratory of Nanosystem and Hierarchical Fabrication, National Center for Nanoscience and Technology, Beijing 100190, China.*

*b. Center of Materials Science and Optoelectronics Engineering, University of Chinese Academy of Sciences, Beijing 100049, P. R. China.*

*c. Testing and Analysis Center, Institute of Chemistry, Chinese Academy of Sciences, Beijing 100190, China.*

*d. School of Physics and Engineering, Zhengzhou University, Zhengzhou 450001, China.*

†These authors contributed equally.

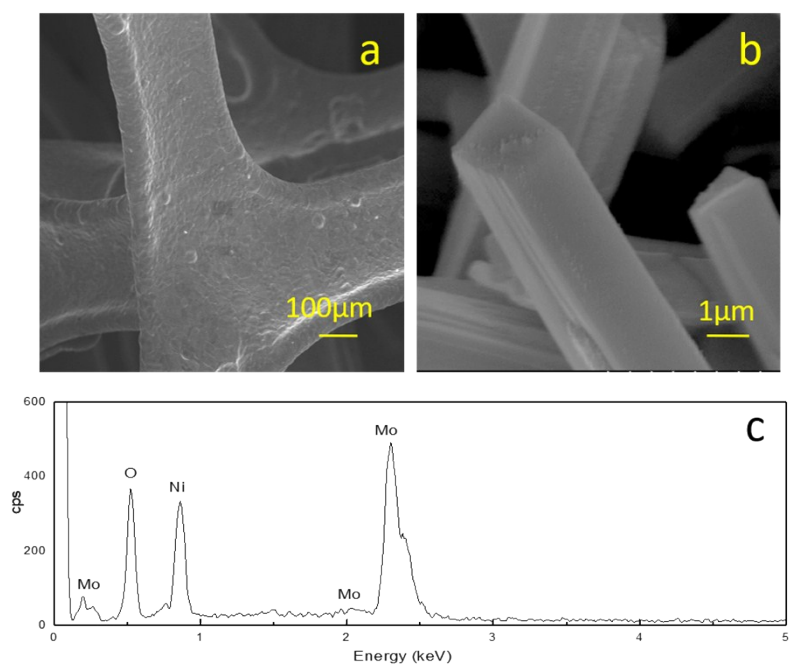

**Fig. S1.** a-b) SEM image of a) Ni foam, b) NiMoO<sub>4</sub> rods. c) EDX spectra of NiMoO<sub>4</sub> rods.

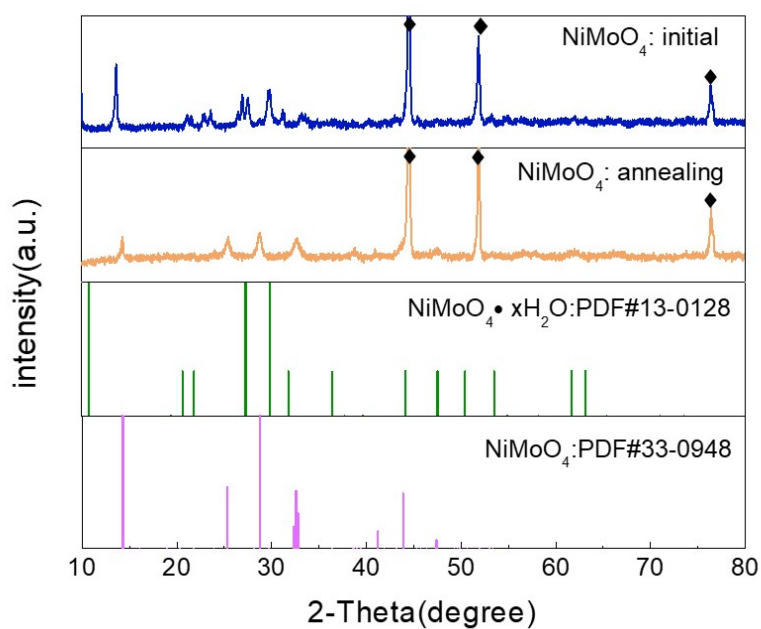

**Fig. S2.** The XRD patterns of NiMoO<sub>4</sub> rods before and after the annealing process at 200 °C.

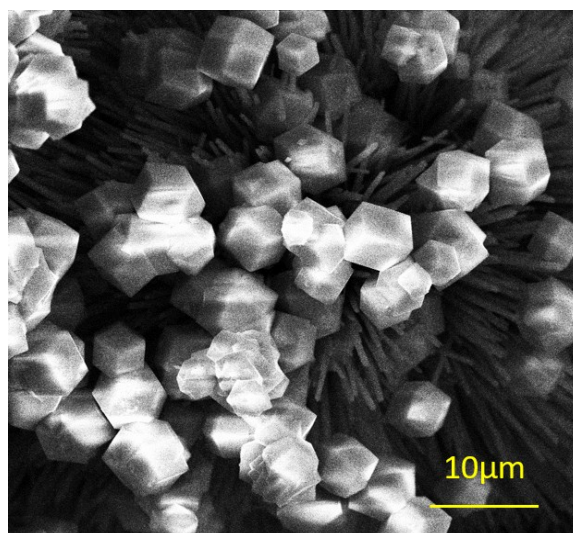

**Fig. S3.** The morphology of Ni-W-O/NiMoO<sub>4</sub>-2 heterostructure synthesized with 2 mmol (NH<sub>4</sub>)<sub>10</sub>W<sub>12</sub>O<sub>41</sub>·xH<sub>2</sub>O.

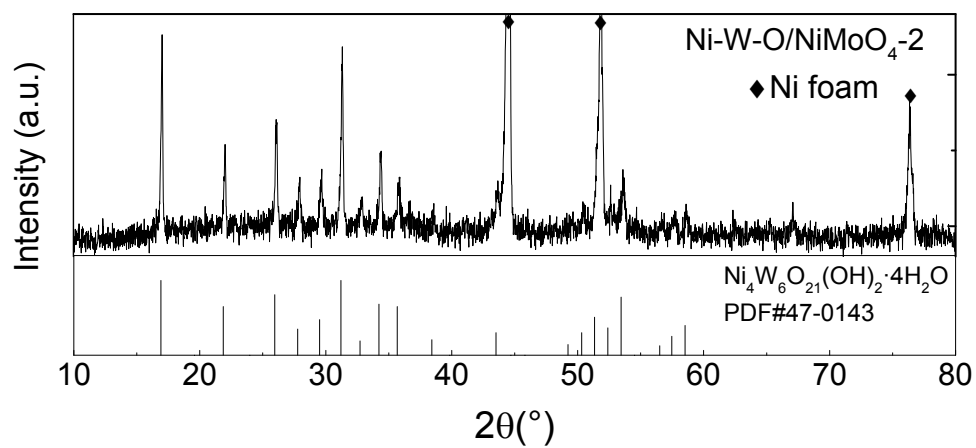

**Fig. S4.** The XRD patterns of Ni-W-O/NiMoO<sub>4</sub>-2 rods.

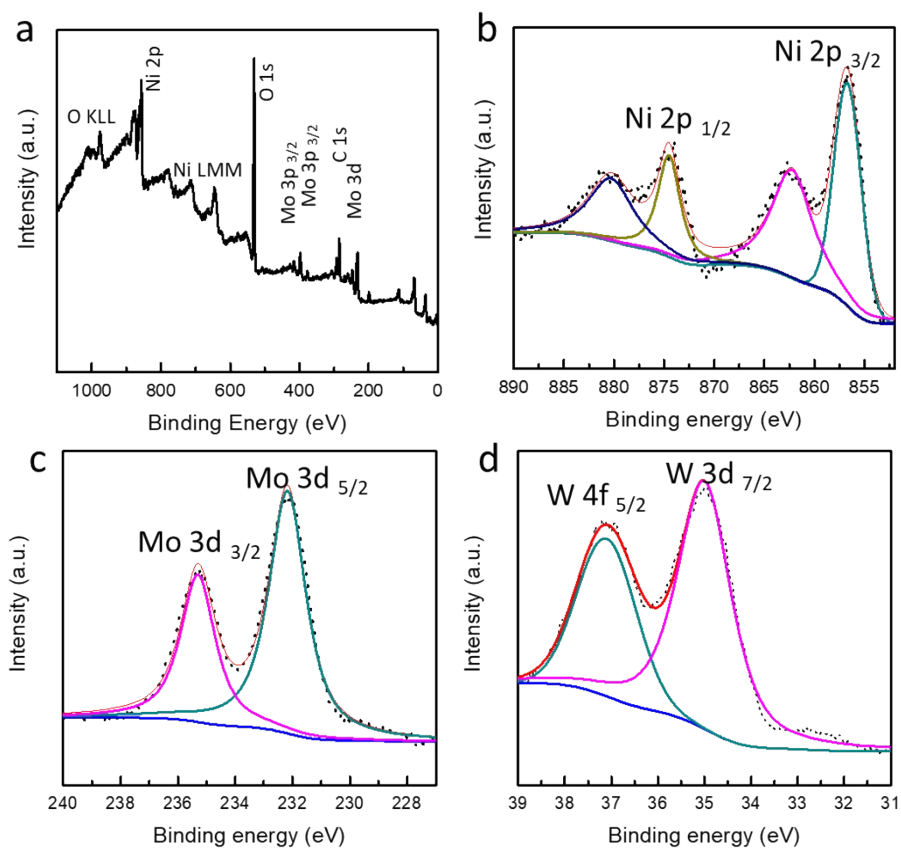

**Fig. S5.** XPS analysis of survey scan (a), Ni 2p (b), Mo 3d (c) and W 2f (d) spectra in the obtained Ni-W-O/NiMoO<sub>4-2</sub> heterostructure.

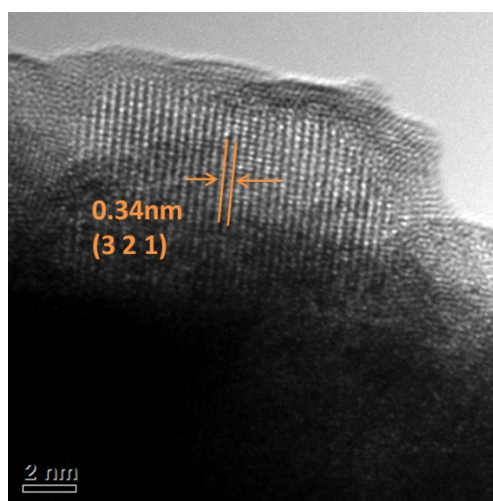

**Fig. S6.** HRTEM image of the microcubes of Ni-W-O/NiMoO<sub>4-2</sub> heterostructures.

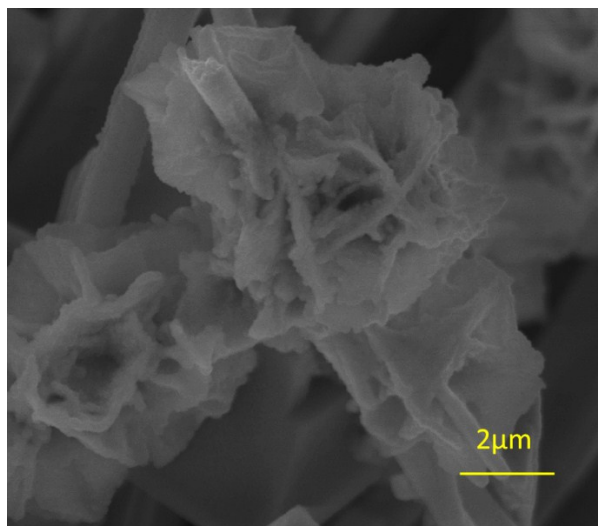

**Fig. S7.** The morphology of Ni-W-O/NiMoO<sub>4-1.5</sub> heterostructure with the moderate concentration (0.05 mol/L) of precursor.

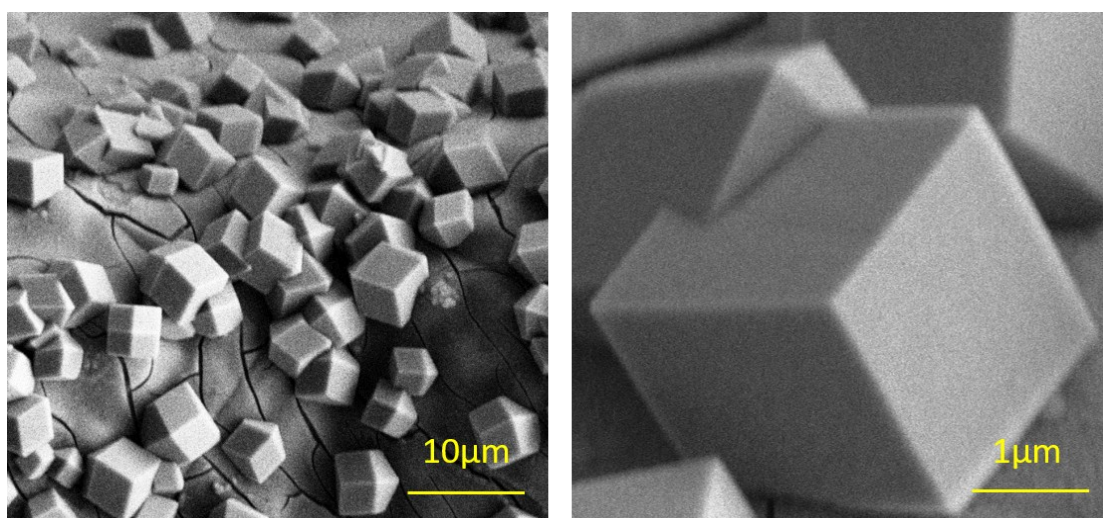

**Fig. S8.** The morphology of pure Ni-W-O microcubes on Ni foam.

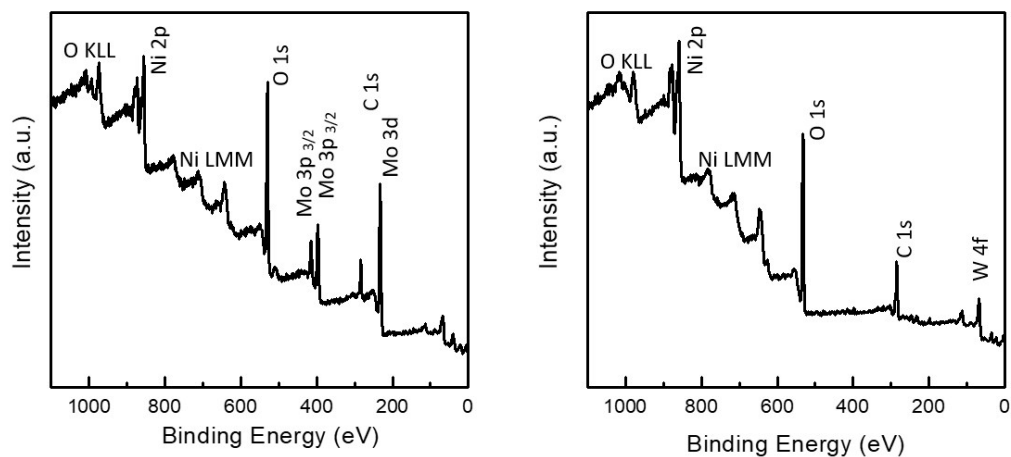

**Fig. S9.** XPS survey of the pure NiMoO<sub>4</sub> rods and the pure Ni-W-O microcubes.

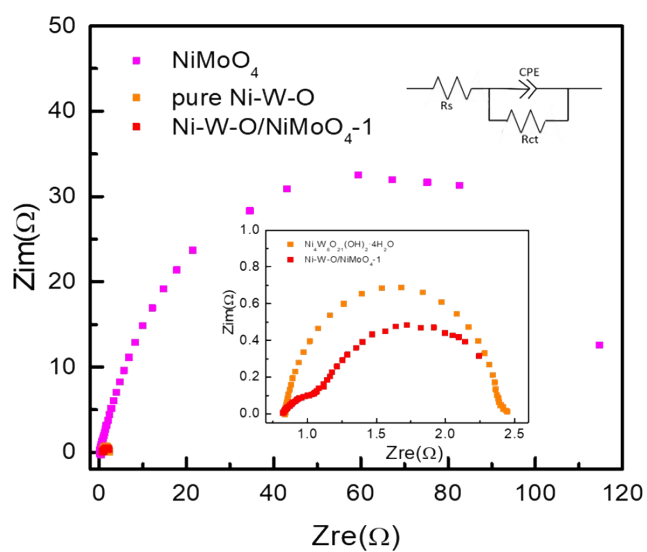

**Fig. S10.** Nyquist plots of NiMoO<sub>4</sub> rods, pure Ni-W-O microcubes and Ni-W-O/NiMoO<sub>4</sub>-1 electrodes tested in N<sub>2</sub> saturated KOH electrolyte for HER.

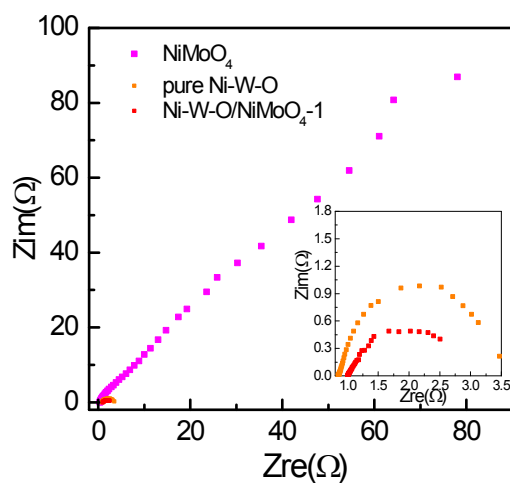

**Fig. S11.** Nyquist plots of  $\text{NiMoO}_4$  rods,  $\text{Ni}_4\text{W}_6\text{O}_{21}(\text{OH})_2 \cdot 4\text{H}_2\text{O}$  microcubes and  $\text{Ni-W-O/NiMoO}_4\text{-1}$  electrodes tested in  $\text{O}_2$  saturated  $\text{KOH}$  electrolyte for OER.

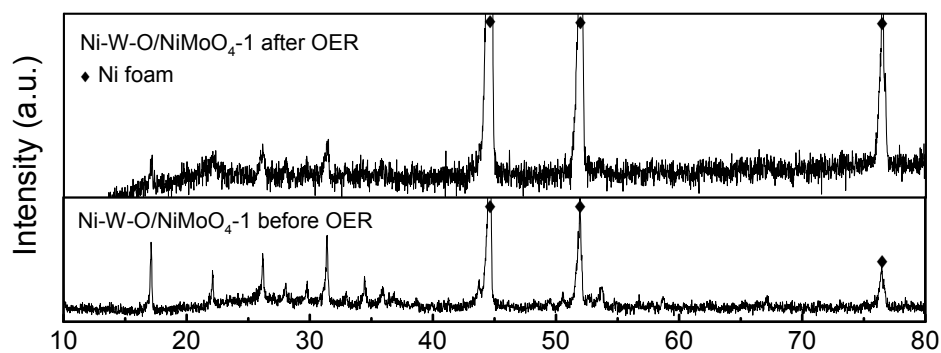

**Fig. S12.** The XRD patterns of  $\text{Ni-W-O/NiMoO}_4\text{-1}$  heterostructure before and after long-term (3 days) OER test.

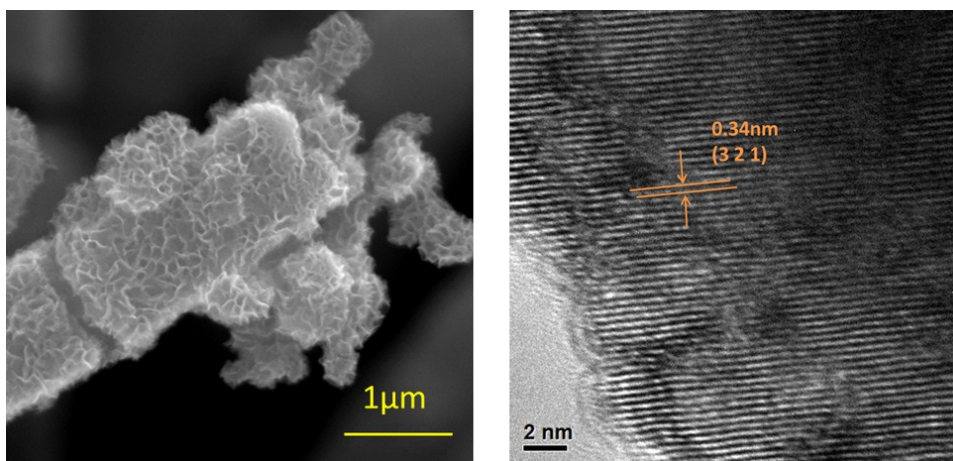

**Fig. S13.** SEM and HRTEM images of the Ni-W-O/NiMoO<sub>4</sub>-1 heterostructure after long-term (3 days) OER test.

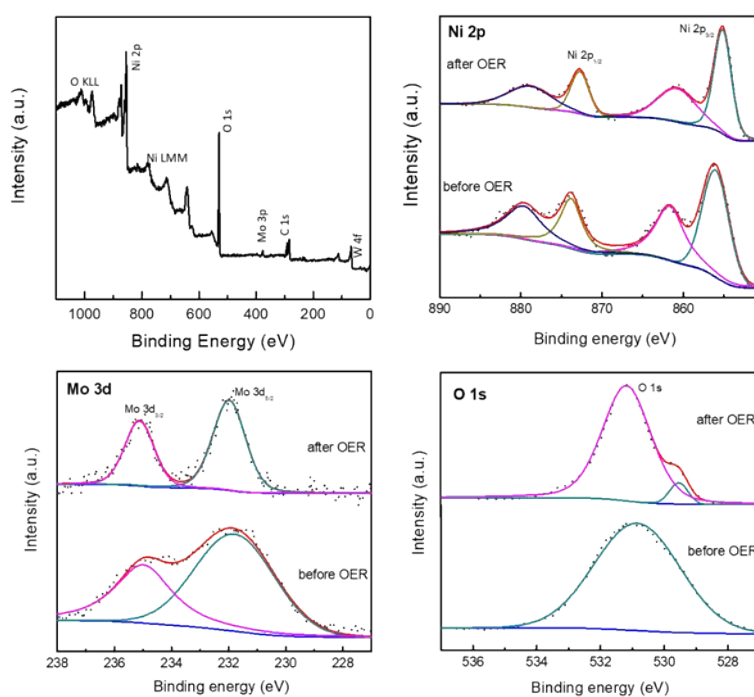

**Fig. S14.** XPS analysis of survey scan (a), Ni 2p (b), Mo 3d (c) and O 1s (d) spectra in the Ni-W-O/NiMoO<sub>4</sub>-1 after long-term (3 days) OER test.



**Table S1.** Comparison of HER performances for various electrocatalysts in 1.0 M KOH.

| Catalyst                                          | Electrolyte    | $\eta_{10}$ (mV)<br>(V vs RHE) | Tafel slope<br>(mA dec <sup>-1</sup> ) | Ref.             |
|---------------------------------------------------|----------------|--------------------------------|----------------------------------------|------------------|
| <b>Ni-W-O/NiMoO<sub>4</sub>-1</b>                 | <b>1 M KOH</b> | <b>52</b>                      | <b>80</b>                              | <b>This work</b> |
| NiCo <sub>2</sub> O <sub>4</sub>                  | 1 M KOH        | 110                            | 49.7                                   | 1                |
| Ni-Co-P-300                                       | 1 M KOH        | 150                            | 60.1                                   | 2                |
| Ni <sub>2</sub> P/Ni/NF                           | 1 M KOH        | 98                             | 72                                     | 3                |
| Ni/NiP                                            | 1 M KOH        | 130                            | 58.5                                   | 4                |
| NiCo <sub>2</sub> S <sub>4</sub> NW/NF            | 1 M KOH        | 210                            | 58.9                                   | 5                |
| MoP/Ni <sub>2</sub> P/NF                          | 1 M KOH        | 75                             | 100.2                                  | 6                |
| Co <sub>4</sub> Ni <sub>1</sub> P NTs             | 1 M KOH        | 129                            | 52                                     | 7                |
| S-NiFe <sub>2</sub> O <sub>4</sub> /NF            | 1 M KOH        | 138                            | 61.3                                   | 8                |
| NiCoP                                             | 1 M KOH        | 62                             | 68.2                                   | 9                |
| Co <sub>4</sub> Mo <sub>2</sub> @NC               | 1 M KOH        | 218                            | 73.5                                   | 10               |
| NiFe-LDH<br>/NiCo <sub>2</sub> O <sub>4</sub> /NF | 1 M KOH        | 192                            | 59                                     | 11               |
| nickel sulfides                                   | 1 M KOH        | 148                            | 79                                     | 12               |
| Cu@NiFe LDH                                       | 1 M KOH        | 116                            | 58.9                                   | 13               |
| Ni/Mo <sub>2</sub> C-PC                           | 1 M KOH        | 179                            | 101                                    | 14               |
| NiFe LDH-NS@DG10                                  | 1 M KOH        | 300                            | 110                                    | 15               |

**Table S2.** Comparison of OER performances for various electrocatalysts in 1.0 M KOH.

| Catalyst                                       | Electrolyte    | $\eta$ (mV)<br>(V vs RHE)  | Tafel slope<br>(mA dec <sup>-1</sup> ) | Ref.             |
|------------------------------------------------|----------------|----------------------------|----------------------------------------|------------------|
| <b>Ni-W-O/NiMoO<sub>4</sub>-1</b>              | <b>1 M KOH</b> | <b>253</b> ( $\eta_{30}$ ) | <b>92</b>                              | <b>This work</b> |
| Ni <sub>3</sub> Se <sub>2</sub> -Au@Glass      | 1 M KOH        | 320( $\eta_{10}$ )         | 97.1                                   | 16               |
| Ni <sub>3</sub> Se <sub>2</sub> -Ni foam       | 1 M KOH        | 270( $\eta_{10}$ )         | 142.8                                  | 16               |
| NiCo <sub>2</sub> O <sub>4</sub>               | 1 M KOH        | 340( $\eta_{10}$ )         | 75                                     | 17               |
| porous MoS <sub>2</sub>                        | 1 M KOH        | 260( $\eta_{10}$ )         | 54                                     | 18               |
| Ni/NiP                                         | 1 M KOH        | 270( $\eta_{30}$ )         | 73.2                                   | 4                |
| NiCo <sub>2</sub> S <sub>4</sub> NW/NF         | 1 M KOH        | 260( $\eta_{10}$ )         | 40.1                                   | 5                |
| MoP/Ni <sub>2</sub> P/NF                       | 1 M KOH        | 300( $\eta_{20}$ )         | 77.6                                   | 6                |
| S-NiFe <sub>2</sub> O <sub>4</sub> /NF         | 1 M KOH        | 267( $\eta_{10}$ )         | 36.7                                   | 8                |
| Co <sub>4</sub> Mo <sub>2</sub> @NC            | 1 M KOH        | 330( $\eta_{10}$ )         | 48.7                                   | 10               |
| NiFe-LDH /NiCo <sub>2</sub> O <sub>4</sub> /NF | 1 M KOH        | 290( $\eta_{50}$ )         | 53                                     | 11               |
| nickel sulfides                                | 1 M KOH        | 320( $\eta_{10}$ )         | 59                                     | 12               |
| Ni/Mo <sub>2</sub> C-PC                        | 1 M KOH        | 368( $\eta_{10}$ )         | -                                      | 19               |

## Reference

- (1) Gao, X.; Zhang, H.; Li, Q.; Yu, X.; Hong, Z.; Zhang, X.; Liang, C.; Lin, Z. *Angew. Chem. Int. Ed. Engl.* 2016, **55**, 6290.
- (2) Feng, Y.; Yu, X.-Y.; Paik, U. *Chem. Commun.* 2016, **52**, 1633.
- (3) You, B.; Jiang, N.; Sheng, M.; Bhushan, M. W.; Sun, Y. *ACS Catal.* 2016, **6**, 714.
- (4) Chen, G.-F.; Ma, T. Y.; Liu, Z.-Q.; Li, N.; Su, Y.-Z.; Davey, K.; Qiao, S.-Z. *Adv. Funct. Mater.* 2016, **26**, 3314.
- (5) Sivanantham, A.; Ganesan, P.; Shanmugam, S. *Adv. Funct. Mater.* 2016, **26**, 4661.
- (6) Du, C.; Shang, M.; Mao, J.; Song, W. *J. Mater. Chem. A* 2017, **5**, 15940.
- (7) Yan, L.; Cao, L.; Dai, P.; Gu, X.; Liu, D.; Li, L.; Wang, Y.; Zhao, X. *Adv. Funct. Mater.* 2017, **27**, 1703455.
- (8) Liu, J.; Zhu, D.; Ling, T.; Vasileff, A.; Qiao, S.-Z. *Nano Energy* 2017, **40**, 264.
- (9) Du, C.; Yang, L.; Yang, F.; Cheng, G.; Luo, W. *ACS Catal.* 2017, **7**, 4131.
- (10) Jiang, J.; Liu, Q.; Zeng, C.; Ai, L. *J. Mater. Chem. A* 2017, **5**, 16929.
- (11) Wang, Z.; Zeng, S.; Liu, W.; Wang, X.; Li, Q.; Zhao, Z.; Geng, F. *ACS Appl. Mater. Inter.* 2017, **9**, 1488.
- (12) Luo, P.; Zhang, H.; Liu, L.; Zhang, Y.; Deng, J.; Xu, C.; Hu, N.; Wang, Y. *ACS Appl. Mater. Inter.* 2017, **9**, 2500.
- (13) Yu, L.; Zhou, H.; Sun, J.; Qin, F.; Yu, F.; Bao, J.; Yu, Y.; Chen, S.; Ren, Z. *Energ. Environ. Sci.* 2017, **10**, 1820.
- (14) Yu, Z. Y.; Duan, Y.; Gao, M. R.; Lang, C. C.; Zheng, Y. R.; Yu, S. H. *Chem. Sci.* 2017, **8**, 968.
- (15) Jia, Y.; Zhang, L.; Gao, G.; Chen, H.; Wang, B.; Zhou, J.; Soo, M. T.; Hong, M.; Yan, X.; Qian, G.; Zou, J.; Du, A.; Yao, X. *Adv. Mater.* 2017, **29**, 1700017.
- (16) Swesi, A. T.; Masud, J.; Nath, M. *Energ. Environ. Sci.* 2016, **9**, 1771.
- (17) Lv, X.; Zhu, Y.; Jiang, H.; Yang, X.; Liu, Y.; Su, Y.; Huang, J.; Yao, Y.; Li, C. *Dalton Trans.* 2015, **44**, 4148.
- (18) Jin, Y.; Wang, H.; Li, J.; Yue, X.; Han, Y.; Shen, P. K.; Cui, Y. *Adv. Mater.* 2016, **28**, 3785.
- (19) Yu, Z.-Y.; Duan, Y.; Gao, M.-R.; Lang, C.-C.; Zheng, Y.-R.; Yu, S.-H. *Chem. Sci.* 2017, **8**, 968.
